# Supplementary material
Source: PubMed Central journal article supplement (PMC11544687)
Supplement: NIHMS1911380-supplement-1.pdf [file NIHMS1911380-supplement-1.pdf]

**Supplemental Table.***Hierarchical Regression of Gay Community Stress on Body Dissatisfaction in Study 1 with Sampling Weights<sup>a</sup> (N = 424)*

| Predictor             | Study 1               |              |          |               |              |          |               |              |          |  |
|-----------------------|-----------------------|--------------|----------|---------------|--------------|----------|---------------|--------------|----------|--|
|                       | Step 1                |              |          | Step 2        |              |          | Step 3        |              |          |  |
|                       | <i>b</i> (SE)         | 95 % CI      | $\beta$  | <i>b</i> (SE) | 95 % CI      | $\beta$  | <i>b</i> (SE) | 95 % CI      | $\beta$  |  |
| <b>Step 1</b>         |                       |              |          |               |              |          |               |              |          |  |
| Sexual orientation    | -0.001 (0.11)         | -0.23, 0.22  | 0.00     | 0.03 (0.12)   | -0.21, 0.27  | 0.01     | 0.04 (0.12)   | -0.20, 0.28  | 0.02     |  |
| Age                   | -0.02 (0.003)         | -0.02, -0.01 | -0.22*** | -0.02 (0.003) | -0.02, -0.01 | -0.23*** | -0.02 (0.003) | -0.02, -0.01 | -0.22*** |  |
| Race/ethnicity        | 0.03 (0.04)           | -0.04, 0.11  | 0.05     | 0.04 (0.04)   | -0.03, 0.11  | 0.05     | 0.04 (0.04)   | -0.03, 0.11  | 0.06     |  |
| Income                | 0.03 (0.01)           | 0.01, 0.10   | 0.17**   | 0.04 (0.01)   | 0.01, 0.06   | 0.19**   | 0.04 (0.01)   | 0.02, 0.06   | 0.21**   |  |
| Education             | -0.27 (0.07)          | -0.40, -0.14 | -0.25*** | -0.25 (0.06)  | -0.38, -0.13 | -0.23*** | -0.27 (0.07)  | -0.40, -0.14 | -0.24*** |  |
| Relationship status   | -0.19 (0.10)          | -0.39, 0.01  | -0.09    | -0.14 (0.10)  | -0.34, 0.06  | -0.07    | -0.15 (0.10)  | -0.34, 0.06  | -0.07    |  |
| <b>Step 2</b>         |                       |              |          |               |              |          |               |              |          |  |
| Rejection sensitivity |                       |              |          | 0.03 (0.01)   | 0.02, 0.04   | 0.21***  | 0.03 (0.01)   | 0.02, 0.04   | 0.21***  |  |
| Internalized stigma   |                       |              |          | 0.09 (0.05)   | -0.01, 0.18  | 0.09     | 0.08 (0.05)   | -0.01, 0.18  | 0.09     |  |
| Identity concealment  |                       |              |          | -0.02 (0.06)  | -0.15, 0.10  | -0.02    | -0.03 (0.06)  | -0.15, 0.01  | -0.03    |  |
| Discrimination        |                       |              |          | 0.01 (0.01)   | -0.002, 0.02 | 0.08     | 0.01 (0.01)   | -0.004, 0.02 | 0.07     |  |
| <b>Step 3</b>         |                       |              |          |               |              |          |               |              |          |  |
| Gay community stress  |                       |              |          |               |              |          | 0.08 (0.07)   | -0.06, 0.23  | 0.06     |  |
| <b>Full Model</b>     |                       |              |          |               |              |          |               |              |          |  |
|                       | <i>R</i> <sup>2</sup> | .09***       |          |               | .16***       |          |               | .16***       |          |  |
|                       | $\Delta R^2$          | --           |          |               | .07***       |          |               | .002         |          |  |

<sup>a</sup> These results differed from the unweighted analyses with respect to statistical significance; however, the effect estimates, although attenuated, were similar in magnitude. We discuss the rationale for interpreting the unweighted results in the full manuscript.

\**p* < .05, \*\**p* < .01, \*\*\**p* < .001
